# Supplementary material
Source: ML conference proceedings conference paper supplement (https://openreview.net/forum?id=Alr5_kKmLBX)
Supplement: supplementary_material [file attachment]

## Appendix

### A Capacity Analysis

In below we give a formal analysis of the higher capacity of STDCF than rank-1 decomposition.

For simplicity, we assume  $C_{in} = C_{out} = 1$ , and only consider the linear convolution operator (omitting the addition of bias and non-linear activation).

We derive the spatiotemporal convolution in continuous integral over space and time. The regular spatiotemporal joint convolution is denoted as  $I \circledast W(u, t) := \int \int I(u + u', t + t') W(u', t') du' dt'$ , with a filter  $W(u, t)$ , where  $u \in \mathbb{R}^2$ , and  $t \in \mathbb{R}$ . Then, the joint convolution generally can be written as

$$J(\lambda) = \sum_{\lambda'} I(\lambda') \circledast W_{(\lambda, \lambda')}$$

where  $W_{(\lambda, \lambda')} : \mathbb{R}^2 \times \mathbb{R} \rightarrow \mathbb{R}$  is local both in space and in time. The proposed convolution by atom is equivalently to writing  $W_{\lambda, \lambda'}$  as

$$W_{(\lambda, \lambda')} = \sum_{i, j} \alpha_{(\lambda, \lambda')}^{i, j} \psi_i(u) \phi_j(t), \quad \alpha_{(\lambda, \lambda')}^{i, j} \in \mathbb{R}, \quad (1)$$

and  $a_{k, l}^{(c, c')}$  are freely trainable, and then

$$J(\lambda) = \sum_{\lambda'} \sum_{i, j} \alpha_{(\lambda, \lambda')}^{i, j} I(\lambda') \circledast (\psi_i \otimes \phi_j), \quad (2)$$

where  $\psi \otimes \phi$  denotes the tensor-ed atom, namely  $\psi \otimes \phi(u, t) = \psi(u) \phi(t)$ . For each fixed pair of  $(\lambda, \lambda')$ ,  $\{\alpha_{(\lambda, \lambda')}^{i, j}\}_{i, j}$  is a  $M$ -by- $N$  matrix, and generally is full rank.

We compare with applying the space convolution and then the temporal convolution sequentially, i.e. the rank-1 3D filter decomposition. In this decomposition, spatial filters are  $W_s = W^{(\lambda'', \lambda')}(u)$ , temporal filters are  $W_t = W^{(\lambda, \lambda'')}(t)$ ,  $\lambda'' \in [C'']$ . Then,

$$Z_{\lambda''} = \sum_{\lambda'} X_{\lambda'} *_u W_s^{(\lambda'', \lambda')}, \quad Y_{\lambda} = \sum_{\lambda''} Z_{\lambda''} *_t W_t^{(\lambda, \lambda'')}, \quad (3)$$

where  $*_u, *_t$  denote spatial and temporal convolution. Write  $W_s^{(\lambda'', \lambda')}$  and  $W_t^{(\lambda, \lambda'')}$  as combination of atoms  $\psi_i$  and  $\phi_j$  respectively,

$$W_s^{(\lambda'', \lambda')} = \sum_i m_{(\lambda'', \lambda')}^i \psi_i, \quad W_t^{(\lambda, \lambda'')} = \sum_j n_{(\lambda, \lambda'')}^j \phi_j,$$

then  $Y_c$  can also be expressed as (2) where

$$\alpha_{(\lambda, \lambda')}^{i, j} = \sum_{\lambda''=1}^{C''} m_{(\lambda'', \lambda')}^i n_{(\lambda, \lambda'')}^j, \quad i \in [K_u], j \in [K_t].$$

Tracking the degree of freedom reveals that  $\alpha_{(\lambda, \lambda')}^{i, j}$  in the above form is more restrictive than being free parameters: To simplify notation, let  $C = C' = C''$ , then  $\alpha_{(\lambda, \lambda')}^{i, j}$  has  $C^2 K_u K_t$  many variables if all free. In comparison,  $m_{(\lambda'', \lambda')}^i$  has  $K_u C^2$  many variables, and  $n_{(\lambda, \lambda'')}^j$  has  $K_t C^2$  many, thus the rank-1 decomposed convolution formulation has only  $(K_u + K_t) C^2$  many free variables in total. This quantifies the loss of expressiveness from (2) to (3).

### B Details about Translate-Rotate MNIST Reconstruction

Here we provide the details of the translate-rotate mnist reconstruction experiments.

| layer   | Rank-1 3D                     | STDCF                         |
|---------|-------------------------------|-------------------------------|
| conv1   | $1 \times 3^2, 4, s(1, 2, 2)$ | $3 \times 3^2, 4, s(2, 2, 2)$ |
|         | $3 \times 1^2, 4, s(2, 1, 1)$ | $(M = 5, N = 3)$              |
| conv2   | $1 \times 3^2, 8, s(1, 2, 2)$ | $3 \times 3^2, 8, s(2, 2, 2)$ |
|         | $3 \times 1^2, 8, s(2, 1, 1)$ | $(M = 5, N = 3)$              |
| deconv1 | $1 \times 3^2, 4, s(1, 2, 2)$ | $3 \times 3^2, 4, s(2, 2, 2)$ |
|         | $3 \times 1^2, 4, s(2, 1, 1)$ | $(M = 5, N = 3)$              |
| deconv2 | $1 \times 3^2, 4, s(1, 2, 2)$ | $3 \times 3^2, 4, s(2, 2, 2)$ |
|         | $3 \times 1^2, 4, s(2, 1, 1)$ | $(M = 5, N = 3)$              |
| conv3   | $1 \times 3^2, 4, s(1, 1, 1)$ | $3 \times 3^2, 1, s(1, 1, 1)$ |
|         | $3 \times 1^2, 1, s(1, 1, 1)$ | $(M = 5, N = 3)$              |

Table A: Architectures for Translate-Rotate MNIST reconstruction experiments.  $s(2, 2, 2)$  indicates the stride for 3D convolution.

**Dataset.** For training set, we randomly select 20,000 digits from original MNIST training set, and create 10,000 8-frame clips with 2 digits in each. For each clip, two digits start translation in random speeds from random positions, where the a digit will bounce backwards when it hit the border of the frame. The frame size is set to be 28, and the digit is formatted as the original MNIST  $28 \times 28$  image. While the digit is translating, it is also rotating in a angular speed of 45 degree/frame to form complex spatiotemporal correlations. In additional, two digits can also overlap to make the reconstruction task more difficult. We construct 5,000 8-frame test clips in the same way of building the training set.

**AutoEncoder Architecture and Training Details.** We adopt a 2-layer 3D CNN for the encoder and 3-layer 3D CNN for the decoder. The autoencoder is instantiated by inserting the rank-1 decomposition or STDCF, as shown in Table A. For Training, we adopt the  $L2$  loss, and use Adam optimizer with  $lr = 1e - 3$ , batchsize 64. We train the model for total 50 epochs.

**Additional Qualitative Results.** We provide additional visualization results to show STDCF captures more spatiotemporal correlations than rank-1 decomposition. As shown in Figure A, STDCF consistently outperforms rank-1 decomposed 3D filters in reconstruction qualities.

## C Details about the KTH experiments

We provide the architecture we used for KTH in both Section 2.1.2 and Section 3.1 in Table B. The 64-dimension representations shown in Figure 3 are obtained after conv3. the baseline method is the representation with  $\tau_{test} = \tau_{train} = 1$ . the tempo-awared methods is to use dilation= $(2, 1, 1)$  in all three convolutional layers. We provide more representation samples in Figure B.

Table B: Architectures for KTH experiment

| layer | Reg. 3D                 | Rank-1 3D          | STDCF              |
|-------|-------------------------|--------------------|--------------------|
| conv1 | $5 \times 3^2, 16$      | $1 \times 3^2, 16$ | $5 \times 3^2, 16$ |
|       |                         | $5 \times 1^2, 16$ | $(M = 5, N = 3)$   |
|       | max-pool 1, 2, 2        |                    |                    |
| conv2 | $5 \times 3^2, 32$      | $1 \times 3^2, 32$ | $5 \times 3^2, 32$ |
|       |                         | $5 \times 1^2, 32$ | $(M = 5, N = 3)$   |
|       | max-pool 2, 2, 2        |                    |                    |
| conv3 | $3 \times 3^2, 64$      | $1 \times 3^2, 64$ | $3 \times 3^2, 64$ |
|       |                         | $3 \times 1^2, 64$ | $(M = 5, N = 2)$   |
|       | max-pool 2, 2, 2        |                    |                    |
|       | global average pool, fc |                    |                    |

## D Details about the Kinetics and Something-Somethingv1 experiments

### D.1 Architecture

We provide the architecture of STDCF-R50 in Table C.

Table C: Architecture of STDCF-R50.

| Stage                  | Layer                                                                                                                                    | Output Size               |
|------------------------|------------------------------------------------------------------------------------------------------------------------------------------|---------------------------|
| raw                    | -                                                                                                                                        | $L \times 224 \times 224$ |
| conv <sub>1</sub>      | $5 \times 7 \times 7, 64, \text{stride } 1, 2, 2$                                                                                        | $L \times 112 \times 112$ |
| pool <sub>1</sub>      | $1 \times 3 \times 3, \text{max}, \text{stride } 1, 2, 2$                                                                                | $L \times 56 \times 56$   |
| res <sub>2</sub>       | $\begin{bmatrix} 1 \times 1 \times 1, 64 \\ \text{STDCF } 3 \times 3 \times 3, 64 \\ 1 \times 1 \times 1, 256 \end{bmatrix} \times 3$    | $L \times 56 \times 56$   |
| res <sub>3</sub>       | $\begin{bmatrix} 1 \times 1 \times 1, 128 \\ \text{STDCF } 3 \times 3 \times 3, 128 \\ 1 \times 1 \times 1, 512 \end{bmatrix} \times 4$  | $L \times 28 \times 28$   |
| res <sub>4</sub>       | $\begin{bmatrix} 1 \times 1 \times 1, 256 \\ \text{STDCF } 3 \times 3 \times 3, 256 \\ 1 \times 1 \times 1, 1024 \end{bmatrix} \times 6$ | $L \times 14 \times 14$   |
| res <sub>5</sub>       | $\begin{bmatrix} 1 \times 1 \times 1, 512 \\ \text{STDCF } 3 \times 3 \times 3, 512 \\ 1 \times 1 \times 1, 2048 \end{bmatrix} \times 3$ | $L \times 7 \times 7$     |
| global average pool,fc |                                                                                                                                          | $1 \times 1 \times 1$     |

## D.2 Accuracies of all ITSL iterations on Kinetics

We provided accuracies of all models learned in *stage-t* and *stage-s* of all three iterations on Kinetics-400 in Table D.

Table D: Accuracies of *stage-t* and *stage-s* models of all three iterations.

| Method        | Top-1 Acc. | Top-5 Acc. |
|---------------|------------|------------|
| STDCF-R50-t-1 | 68.2       | 88.4       |
| STDCF-R50-s-1 | 70.8       | 89.1       |
| STDCF-R50-t-2 | 72.0       | 89.7       |
| STDCF-R50-s-2 | 73.1       | 90.2       |
| STDCF-R50-t-3 | 73.6       | 90.3       |
| STDCF-R50-s-3 | 74.0       | 90.6       |
| STDCF-R50     | 74.5       | 91.2       |

## D.3 Accuracies of all ITSL iterations on Something-Somethingv1

We provided accuracies of all models learned in *stage-t* and *stage-s* of all three iterations on Something-Somethingv1 in Table E.

Table E: Accuracies of *stage-t* and *stage-s* models of two iterations.

| Method        | Top-1 Acc. | Top-5 Acc. |
|---------------|------------|------------|
| STDCF-R50-t-1 | 42.3       | 71.8       |
| STDCF-R50-s-1 | 44.1       | 73.6       |
| STDCF-R50-t-2 | 44.8       | 74.3       |
| STDCF-R50-s-2 | 45.1       | 74.7       |
| STDCF-R50     | 45.9       | 75.2       |

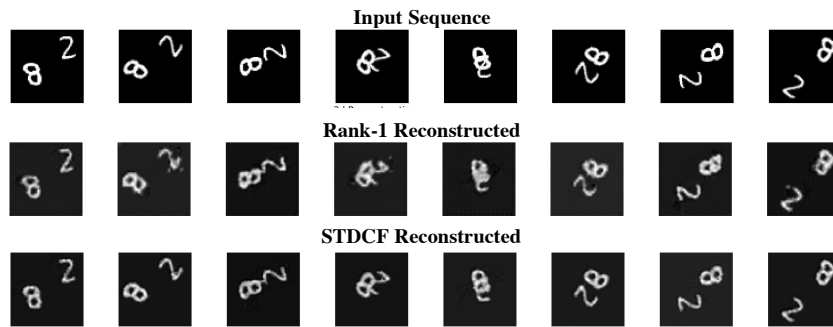

(a)

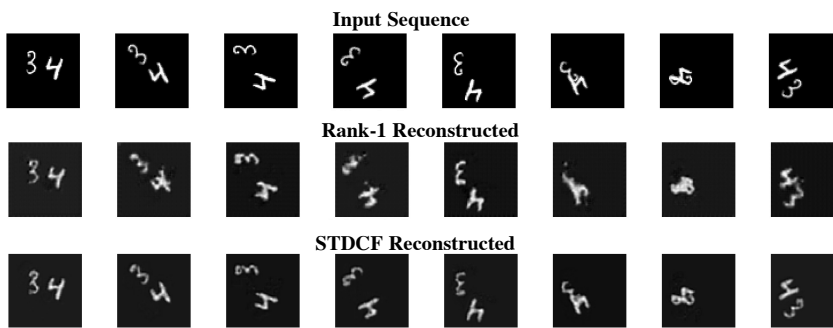

(b)

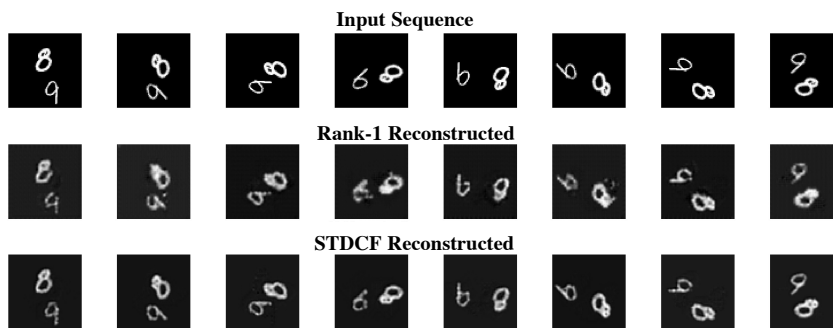

(c)

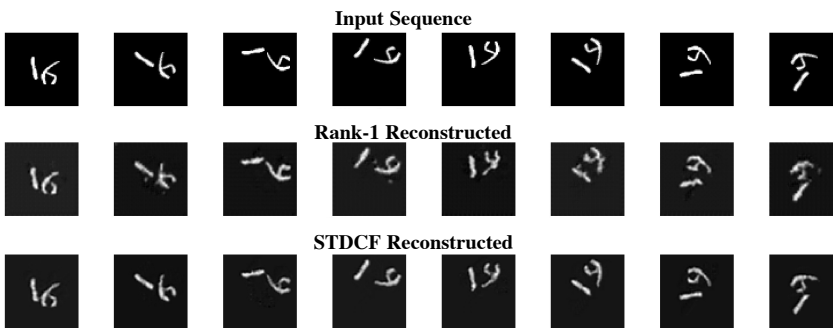

(d)

Figure A: More visualizations for TR-MNIST reconstruction.

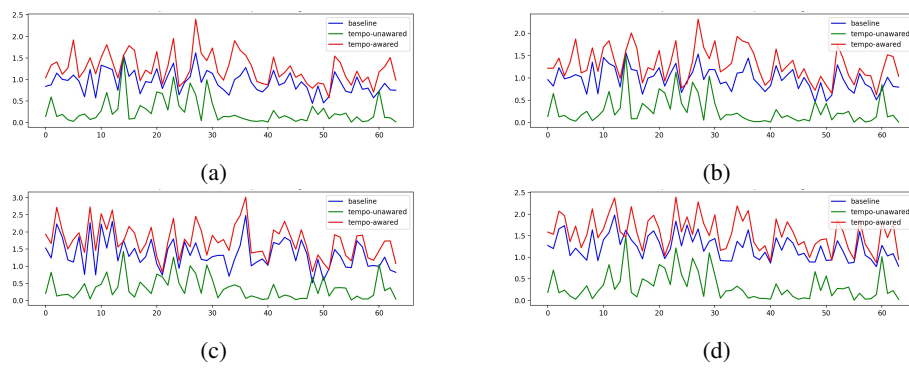

Figure B: More visualizations of representation comparisons.
